# Supplementary material for: Pushing nano-aerosol measurements towards a new decade – technical note on the Airmodus particle size magnifier 2.0
Source: Copernicus journal article supplement (doi:10.5194/ar-2-13-2024), 2024-02-20
Supplement: Supplementary file 1 [file ar-2-13-2024-supplement.pdf]

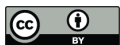

*Supplement of*

## **Pushing nano-aerosol measurements towards a new decade – technical note on the Airmodus particle size magnifier 2.0**

**Juha Sulo et al.**

*Correspondence to:* Juha Sulo ([juha.sulo@helsinki.fi](mailto:juha.sulo@helsinki.fi))

The copyright of individual parts of the supplement might differ from the article licence.

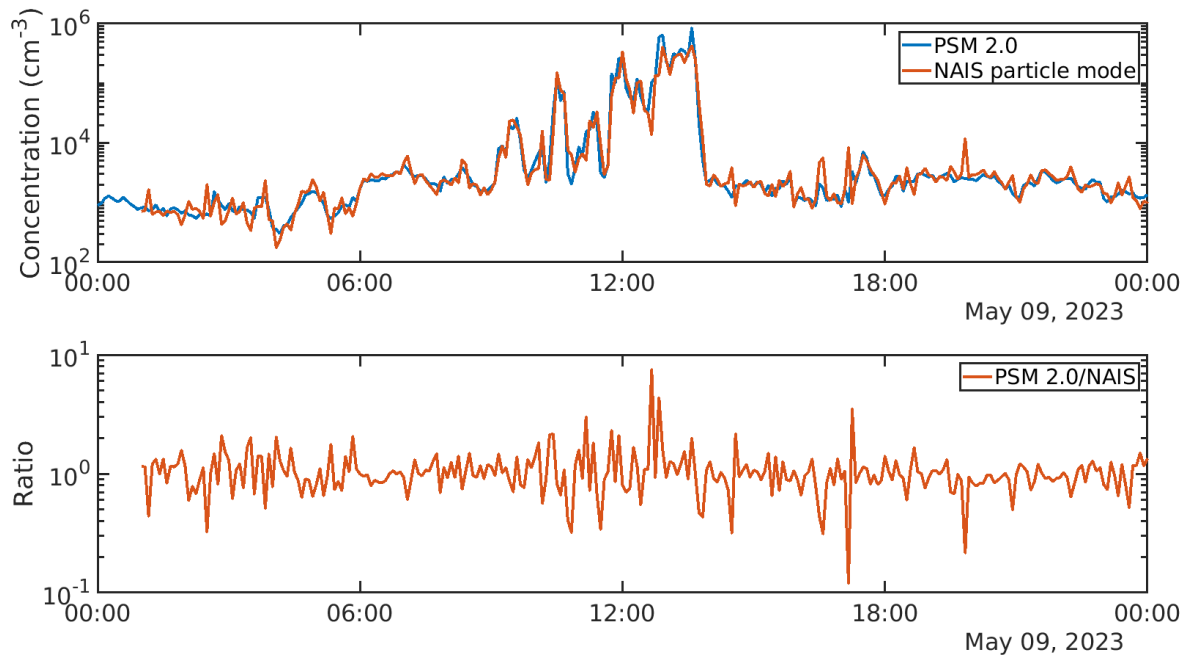

Figure S1: a) The concentration of 2.5 – 7 nm aerosols measured by the PSM 2.0 and NAIS in particle mode. b) The ratio of the PSM 2.0 and NAIS signal in the 2.5 – 7 nm size range.

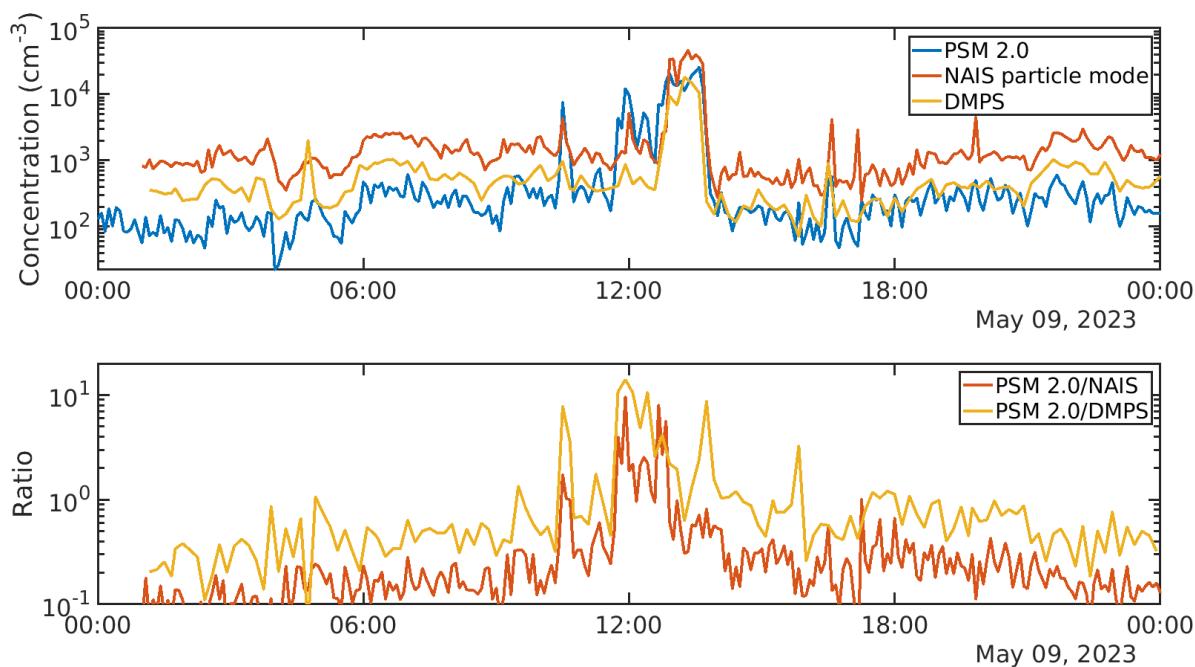

Figure S2: a) The concentration of 7 – 12 nm aerosols measured by the PSM 2.0 and NAIS in particle mode. b) The ratio of the PSM 2.0 and NAIS signal in the 7 – 12 nm size range.
